# Supplementary material for: Exercise Moderates Age-Related Decline in Motor Imagery Vividness Across the Lifespan
Source: Research Square preprint supplement (doi:10.21203/rs.3.rs-7676103/v1), 2025-10-10
Supplement: Supplementary file 1 [file 4e06bf3fa287767b4dbfedec.xlsx]

## Sheet: Sheet1
Age_Group	Exercise_Experience	Exercise_Frequency	Exercise_Type	Exercise_Experience_Binary	Exercise_Frequency_Categorical	VMIQ-2_First-Person	VMIQ-2_Third-Person	Age_Group_Numeric	Gender	Gender_Binary	Actual_Age
Young (18-30)	Yes	None	None	1	0	18	16	0	Female	1	24
Young (18-30)	No	None	None	0	0	19	14	0	Male	0	21
Young (18-30)	No	None	None	0	0	19	15	0	Male	0	30
Young (18-30)	Yes	Once a week or more	Yoga	1	1	12	12	0	Male	0	28
Young (18-30)	Yes	None	None	1	0	12	13	0	Female	1	25
Young (18-30)	Yes	Once a week or more	Gym Training	1	1	12	12	0	Female	1	30
Young (18-30)	Yes	None	None	1	0	18	14	0	Female	1	22
Young (18-30)	No	None	None	0	0	18	15	0	Male	0	24
Young (18-30)	Yes	Once a week or more	Walking	1	1	12	12	0	Male	0	27
Young (18-30)	No	None	None	0	0	19	15	0	Male	0	20
Young (18-30)	Yes	Once a week or more	Walking	1	1	12	16	0	Female	1	24
Young (18-30)	No	None	None	0	0	19	16	0	Male	0	28
Young (18-30)	No	None	None	0	0	13	16	0	Male	0	28
Young (18-30)	Yes	Once a week or more	Running	1	1	17	12	0	Female	1	25
Young (18-30)	Yes	Once a week or more	None	1	1	15	15	0	Female	1	22
Young (18-30)	Yes	None	None	1	0	18	17	0	Female	1	21
Young (18-30)	Yes	Once a week or more	Gym Training	1	1	17	14	0	Female	1	25
Young (18-30)	Yes	Once a week or more	Walking	1	1	13	12	0	Male	0	25
Young (18-30)	Yes	Once a week or more	Walking	1	1	12	12	0	Female	1	20
Young (18-30)	Yes	Once a week or more	Walking	1	1	12	12	0	Female	1	23
Young (18-30)	Yes	None	None	1	0	16	14	0	Male	0	22
Young (18-30)	Yes	Once a week or more	Walking	1	1	13	12	0	Female	1	19
Young (18-30)	Yes	Once a week or more	Team Sports	1	1	12	12	0	Female	1	25
Young (18-30)	Yes	Once a week or more	Other	1	1	16	12	0	Female	1	29
Young (18-30)	Yes	None	None	1	0	12	14	0	Female	1	23
Young (18-30)	No	None	None	0	0	16	14	0	Male	0	19
Young (18-30)	Yes	None	None	1	0	14	15	0	Female	1	29
Young (18-30)	Yes	Once a week or more	Gym Training	1	1	13	14	0	Male	0	22
Young (18-30)	Yes	None	None	1	0	13	14	0	Male	0	18
Young (18-30)	Yes	Once a week or more	Running	1	1	12	14	0	Female	1	29
Young (18-30)	Yes	Once a week or more	Walking	1	1	16	12	0	Male	0	27
Young (18-30)	Yes	Once a week or more	Walking	1	1	12	12	0	Female	1	23
Young (18-30)	Yes	None	None	1	0	20	14	0	Female	1	30
Young (18-30)	No	None	None	0	0	13	15	0	Male	0	29
Young (18-30)	No	None	None	0	0	18	14	0	Male	0	26
Young (18-30)	No	None	None	0	0	18	17	0	Male	0	18
Young (18-30)	Yes	None	None	1	0	12	14	0	Female	1	28
Young (18-30)	Yes	Once a week or more	Running	1	1	16	12	0	Female	1	28
Young (18-30)	Yes	Once a week or more	Team Sports	1	1	12	12	0	Male	0	27
Young (18-30)	Yes	Once a week or more	Team Sports	1	1	13	12	0	Female	1	29
Young (18-30)	Yes	Once a week or more	Running	1	1	15	12	0	Female	1	29
Young (18-30)	Yes	None	None	1	0	12	14	0	Female	1	20
Young (18-30)	Yes	None	None	1	0	15	16	0	Female	1	29
Young (18-30)	No	None	None	0	0	13	14	0	Male	0	24
Young (18-30)	Yes	Once a week or more	Team Sports	1	1	17	12	0	Female	1	21
Young (18-30)	Yes	Once a week or more	Other	1	1	17	12	0	Male	0	26
Young (18-30)	Yes	None	None	1	0	12	14	0	Female	1	20
Young (18-30)	Yes	None	None	1	0	20	14	0	Male	0	22
Young (18-30)	Yes	None	None	1	0	14	16	0	Male	0	20
Young (18-30)	Yes	None	None	1	0	16	14	0	Female	1	24
Middle-aged (31-55)	No	None	None	0	0	27	18	1	Male	0	51
Middle-aged (31-55)	No	None	None	0	0	25	14	1	Male	0	39
Middle-aged (31-55)	No	None	None	0	0	30	17	1	Male	0	37
Middle-aged (31-55)	No	None	None	0	0	29	18	1	Male	0	48
Middle-aged (31-55)	Yes	None	None	1	0	23	21	1	Male	0	34
Middle-aged (31-55)	No	None	None	0	0	27	21	1	Male	0	55
Middle-aged (31-55)	Yes	Once a week or more	Other	1	1	26	12	1	Female	1	44
Middle-aged (31-55)	Yes	None	None	1	0	28	14	1	Female	1	48
Middle-aged (31-55)	Yes	Once a week or more	Team Sports	1	1	21	17	1	Female	1	39
Middle-aged (31-55)	Yes	Once a week or more	None	1	1	22	14	1	Female	1	51
Middle-aged (31-55)	Yes	Once a week or more	Running	1	1	20	12	1	Female	1	32
Middle-aged (31-55)	Yes	None	None	1	0	21	19	1	Female	1	50
Middle-aged (31-55)	No	None	None	0	0	22	14	1	Male	0	45
Middle-aged (31-55)	Yes	Once a week or more	Other	1	1	25	13	1	Female	1	37
Middle-aged (31-55)	Yes	None	None	1	0	19	20	1	Female	1	42
Middle-aged (31-55)	Yes	Once a week or more	Team Sports	1	1	19	13	1	Male	0	38
Middle-aged (31-55)	Yes	Once a week or more	Gym Training	1	1	25	16	1	Female	1	45
Middle-aged (31-55)	No	None	None	0	0	21	18	1	Male	0	33
Middle-aged (31-55)	Yes	None	None	1	0	26	20	1	Female	1	44
Middle-aged (31-55)	No	None	None	0	0	22	14	1	Male	0	47
Middle-aged (31-55)	No	None	None	0	0	28	19	1	Male	0	34
Middle-aged (31-55)	Yes	Once a week or more	Gym Training	1	1	20	15	1	Female	1	48
Middle-aged (31-55)	Yes	Once a week or more	Running	1	1	23	12	1	Female	1	38
Middle-aged (31-55)	No	None	None	0	0	23	15	1	Male	0	34
Middle-aged (31-55)	No	None	None	0	0	27	18	1	Male	0	32
Middle-aged (31-55)	No	None	None	0	0	30	15	1	Male	0	36
Middle-aged (31-55)	No	None	None	0	0	29	15	1	Male	0	52
Middle-aged (31-55)	Yes	Once a week or more	Walking	0	1	19	16	1	Female	1	40
Middle-aged (31-55)	Yes	None	None	1	0	24	20	1	Female	1	34
Middle-aged (31-55)	Yes	None	None	1	0	23	17	1	Female	1	52
Middle-aged (31-55)	No	None	None	0	0	24	21	1	Male	0	48
Middle-aged (31-55)	Yes	Once a week or more	Gym Training	1	1	22	12	1	Male	0	42
Middle-aged (31-55)	Yes	Once a week or more	Walking	1	1	19	16	1	Female	1	32
Middle-aged (31-55)	Yes	Once a week or more	Gym Training	1	1	18	17	1	Female	1	40
Middle-aged (31-55)	Yes	Once a week or more	None	1	1	22	12	1	Female	1	34
Middle-aged (31-55)	Yes	None	None	1	0	21	17	1	Female	1	44
Middle-aged (31-55)	No	None	None	0	0	26	18	1	Male	0	46
Middle-aged (31-55)	Yes	Once a week or more	Yoga	1	1	19	16	1	Male	0	45
Middle-aged (31-55)	No	None	None	0	0	30	14	1	Male	0	38
Middle-aged (31-55)	Yes	Once a week or more	Running	1	1	20	17	1	Female	1	44
Middle-aged (31-55)	Yes	None	None	1	0	19	14	1	Female	1	53
Middle-aged (31-55)	No	None	None	0	0	26	18	1	Male	0	55
Middle-aged (31-55)	No	None	None	0	0	30	15	1	Male	0	38
Middle-aged (31-55)	Yes	Once a week or more	None	1	1	26	15	1	Male	0	51
Middle-aged (31-55)	No	None	None	0	0	22	18	1	Male	0	46
Middle-aged (31-55)	Yes	None	None	1	0	22	16	1	Female	1	43
Middle-aged (31-55)	Yes	Once a week or more	Gym Training	1	1	22	14	1	Male	0	48
Middle-aged (31-55)	Yes	None	None	1	0	23	16	1	Female	1	45
Middle-aged (31-55)	Yes	None	None	1	0	20	14	1	Female	1	51
Middle-aged (31-55)	Yes	None	None	1	0	24	17	1	Female	1	54
Older (56+)	Yes	Once a week or more	Walking	1	1	25	14	2	Female	1	80
Older (56+)	Yes	Once a week or more	Yoga	1	1	34	15	2	Male	0	68
Older (56+)	Yes	None	None	1	0	30	22	2	Female	1	64
Older (56+)	Yes	Once a week or more	Running	1	1	38	17	2	Male	0	70
Older (56+)	No	None	None	0	0	37	24	2	Male	0	68
Older (56+)	Yes	Once a week or more	Team Sports	1	1	38	21	2	Female	1	56
Older (56+)	Yes	None	None	1	0	29	19	2	Female	1	80
Older (56+)	No	None	None	0	0	32	26	2	Male	0	62
Older (56+)	Yes	Once a week or more	Team Sports	1	1	28	15	2	Female	1	64
Older (56+)	Yes	Once a week or more	Gym Training	1	1	25	15	2	Female	1	79
Older (56+)	Yes	None	None	1	0	31	22	2	Female	1	56
Older (56+)	Yes	None	None	1	0	36	17	2	Female	1	67
Older (56+)	No	None	None	0	0	37	23	2	Male	0	63
Older (56+)	No	None	None	0	0	37	17	2	Male	0	79
Older (56+)	Yes	None	None	1	0	34	21	2	Male	0	66
Older (56+)	No	None	None	0	0	32	26	2	Male	0	74
Older (56+)	No	None	None	0	0	34	24	2	Male	0	72
Older (56+)	Yes	None	None	1	0	34	20	2	Female	1	63
Older (56+)	No	None	None	0	0	33	21	2	Male	0	58
Older (56+)	Yes	Once a week or more	Gym Training	1	1	29	16	2	Male	0	58
Older (56+)	No	None	None	0	0	35	19	2	Male	0	56
Older (56+)	No	None	None	0	0	35	24	2	Male	0	60
Older (56+)	Yes	None	None	1	1	28	19	2	Female	1	65
Older (56+)	Yes	None	None	1	0	34	17	2	Female	1	62
Older (56+)	Yes	Once a week or more	Walking	1	1	32	15	2	Female	1	64
Older (56+)	Yes	Once a week or more	Yoga	1	1	30	21	2	Female	1	62
Older (56+)	No	None	None	0	0	39	20	2	Male	0	64
Older (56+)	No	None	None	0	1	33	21	2	Male	0	63
Older (56+)	Yes	None	None	1	0	32	21	2	Female	1	67
Older (56+)	Yes	None	None	1	0	31	18	2	Male	0	57
Older (56+)	Yes	None	None	1	1	37	19	2	Female	1	56
Older (56+)	Yes	Once a week or more	Walking	1	1	33	14	2	Female	1	71
Older (56+)	Yes	Once a week or more	Walking	1	1	28	14	2	Female	1	78
Older (56+)	Yes	Once a week or more	Other	1	1	30	16	2	Female	1	78
Older (56+)	No	None	None	0	0	31	22	2	Male	0	79
Older (56+)	Yes	Once a week or more	Yoga	1	1	36	19	2	Female	1	60
Older (56+)	Yes	Once a week or more	Running	1	1	36	22	2	Male	0	58
Older (56+)	No	None	None	0	0	32	19	2	Male	0	67
Older (56+)	Yes	Once a week or more	Gym Training	1	1	36	15	2	Female	1	63
Older (56+)	No	None	None	0	0	39	26	2	Male	0	77
Older (56+)	No	None	None	0	0	31	22	2	Male	0	58
Older (56+)	Yes	Once a week or more	Walking	1	1	32	15	2	Female	1	56
Older (56+)	Yes	None	None	1	0	37	18	2	Female	1	58
Older (56+)	Yes	Once a week or more	Yoga	1	1	28	20	2	Female	1	60
Older (56+)	Yes	Once a week or more	Team Sports	1	1	31	17	2	Female	1	70
Older (56+)	Yes	Once a week or more	Gym Training	1	1	35	13	2	Female	1	69
Older (56+)	Yes	None	None	1	0	33	19	2	Male	0	58
Older (56+)	Yes	Once a week or more	Team Sports	1	1	33	22	2	Male	0	56
Older (56+)	Yes	None	None	1	0	37	24	2	Female	1	60
Older (56+)	Yes	Once a week or more	Running	0	1	35	8	2	Female	1	77
